# Supplementary material for: Systems analysis of multiple regulator perturbations allows discovery of virulence factors in Salmonella
Source: Springer Nature journal article supplement (doi:10.1186/1752-0509-5-100), 2011-06-28
Supplement: Additional file 14 [file 1752-0509-5-100-s14.pdf]

## Additional file 14

**Supplementary Table S5. Primers used in qRT-PCR**

| Name                    | Forward primers (5' to 3') | Reverse primers (5' to 3') |
|-------------------------|----------------------------|----------------------------|
| <i>gyrB</i>             | GGCTACAGCAAAAAAGCCAAA      | GGAGAATTTCCGGATCCGGTACT    |
| <i>srfN</i>             | AAAAAACGCATTATTGCCGCCG     | TTGAAGTGGCTGATTTCTTGTTTAG  |
| <i>pagC</i>             | ACAGATGAATCCGCTGGAGAA      | CCGACGTTGAAGCCGTTTATT      |
| <i>pagD</i>             | TATTCCTTTCCTGGCGTCAT       | AAAAGCAAGCCAGGCAGATTAG     |
| <i>pagK1/pagK2/pagJ</i> | CACGTCAAGAGCGTATTTTTAGCA   | ATGATCTTGAGAGTCTGCCGCTAT   |
| <i>pagK1/pagK2/pagJ</i> | TCTTACAATAGCGGCAGACTCTCA   | CAGGCCAAAGATTACACCACTTT    |
| <i>ssaE</i>             | CCGCAGCAATATCAGCAAAA       | AAGTGCCTGTTATGGTAACGA      |
| <i>sseA</i>             | AAAGGCTGCGTTTAGTGAATATCG   | TGACTCACCTTAGCCCGGATT      |
| <i>ssaA</i>             | GGCTCGCTGCGTATGTTGTT       | GCCGGCGAATTCTTTTACCT       |
| <i>ssaG</i>             | ATGATTGCTCAACCCAGAA        | TTTAGCAATGATTCCACTAAGCA    |
| <i>ssaH</i>             | TTCCCAGGTACATGCGATGTTA     | TCATTTAAACCCGCCAACAATA     |
| <i>ssaN</i>             | GATGCAACGTCTGAGGCTGAA      | GGCAACCACGCATTTAACA        |
| <i>srfH</i>             | GATACCCCCCTGAAATGAGTT      | GTGACAAATCGTCCAGATGCA      |
| <i>sseJ</i>             | GGAAGCTTTTGGTCTTGCAAA      | CTGTCCGCAAAAAATACCAGTCT    |
| <i>phoP</i>             | TCCGGATATCGCTATTGTCTGAT    | ACCAGAACCGGCAGTGAAAC       |
| <i>ssrB</i>             | CCGCAGGTGCTAATGGCTAT       | TTGGGTCAATGTAACGCTTGTT     |
